# Supplementary material for: Tunable phosphate-mediated stability of Ce3+ ions in cerium oxide nanoparticles for enhanced switching efficiency of their anti/pro-oxidant activities
Source: Royal Society of Chemistry journal article supplement (doi:10.1039/d0bm01860k), 2020-12-24
Supplement: d0bm01860k1.pdf [file d0bm01860k1.pdf]

## Supplementary Information

### Tunable phosphate-mediated stability of $\text{Ce}^{3+}$ ions in cerium oxide nanoparticles for enhanced switching efficiency of their anti/pro-oxidant activities

Tamaki Naganuma\*<sup>a</sup>

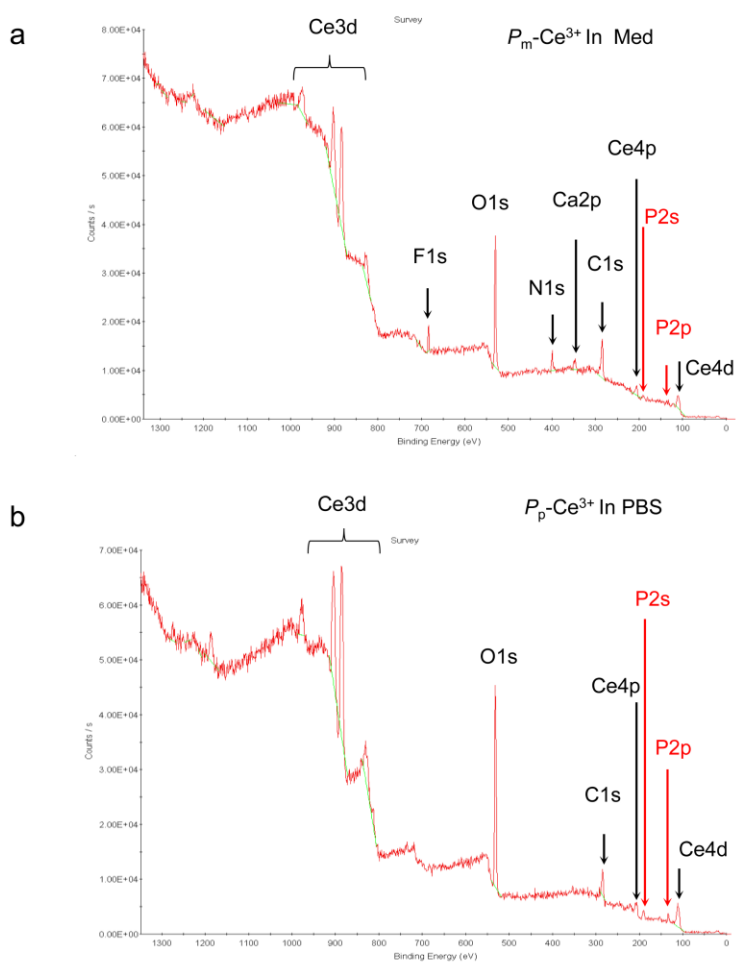

Figure S1. Survey spectra: (a)  $P_m\text{-Ce}^{3+}$  ions in Med-treated  $V_o\text{-CNPLs}$ ; and (b)  $P_p\text{-Ce}^{3+}$  ions in PBS-treated  $V_o\text{-CNPLs}$ . Specific peaks corresponding to F, N and Ca were observed after Med-treatment, whereas peaks corresponding to P (phosphorus) only was detected as a common adsorbed element on both Med/PBS-treated  $V_o\text{-CNPLs}$  (note: except Ce, O and C).
